# Supplementary material
Source: MDPI journal article supplement (https://www.mdpi.com/2076-3417/12/12/6165)
Supplement: s1 [file s1]

## Supplementary Material

**Table S1.** The area under ROC curve (AUC), optimal cut-off values, sensitivity (Sens.), specificities (Spec.) and Youden Index of anthropometric indices in sarcopenia by using FMI-FFMI or FM to FFM ratio in women.

| Anthropometric indices                     | FFMI-FMI-sarcopenia |      |           |          |         |       |       |              |
|--------------------------------------------|---------------------|------|-----------|----------|---------|-------|-------|--------------|
|                                            | AUC                 | SD   | 95% CI    | <i>p</i> | Cut off | Sens. | Spec. | Youden Index |
| Σ4 skinfolds, mm                           | 0.72                | 0.06 | 0.66–0.78 | <0.0001  | 52.8    | 61.9  | 78.8  | 0.41         |
| ABSI, m <sup>11/6</sup> kg <sup>-2/3</sup> | 0.52                | 0.06 | 0.45–0.58 | 0.8020   | 0.08    | 4.76  | 82.8  | 0.12         |
| AMA, cm                                    | 0.71                | 0.06 | 0.65–0.77 | 0.0003   | 32.2    | 61.9  | 80.3  | 0.42         |
| AVI, cm <sup>2</sup>                       | 0.70                | 0.05 | 0.64–0.76 | <0.0001  | 16.2    | 100   | 40.4  | 0.40         |
| BAI, %                                     | 0.75                | 0.05 | 0.69–0.81 | <0.0001  | 24.9    | 57.1  | 88.7  | 0.46         |
| BMI, kg/m <sup>2</sup>                     | 0.79                | 0.05 | 0.73–0.84 | <0.0001  | 22.7    | 85.7  | 61.1  | 0.68         |
| BRI, -                                     | 0.72                | 0.05 | 0.65–0.77 | <0.0001  | 3.52    | 95.2  | 48.8  | 0.44         |
| FFM, %                                     | 0.58                | 0.06 | 0.52–0.65 | 0.1273   | 60.8    | 95.2  | 30.0  | 0.25         |
| FM, %                                      | 0.59                | 0.05 | 0.53–0.66 | 0.0861   | 35.5    | 90.5  | 36.9  | 0.27         |
| FM/FFM, -                                  | 0.58                | 0.06 | 0.52–0.65 | 0.1386   | 0.64    | 95.2  | 30.5  | 0.26         |
| MAC, cm                                    | 0.75                | 0.05 | 0.69–0.80 | <0.0001  | 27.0    | 80.9  | 57.6  | 0.39         |
| MUAC, cm                                   | 0.71                | 0.06 | 0.65–0.77 | 0.0003   | 20.1    | 61.9  | 80.3  | 0.42         |
| MUAC/H, -                                  | 0.76                | 0.05 | 0.70–0.82 | <0.0001  | 0.15    | 57.1  | 83.7  | 0.41         |
| RFM, -                                     | 0.72                | 0.05 | 0.65–0.77 | <0.0001  | 36.7    | 95.2  | 48.8  | 0.44         |
| WC, cm                                     | 0.70                | 0.05 | 0.63–0.76 | <0.0001  | 86      | 95.2  | 42.9  | 0.38         |
| WHR, -                                     | 0.62                | 0.05 | 0.56–0.69 | 0.015    | 0.82    | 90.5  | 46.8  | 0.37         |
| WHtR, -                                    | 0.72                | 0.05 | 0.65–0.77 | <0.0001  | 0.51    | 95.2  | 48.8  | 0.44         |

ABSI, body shape index; AMA, arm muscular area; AVI, abdominal volume index; BAI, body obesity index; BMI, body mass index; BRI, body roundness index; H, height; HC, hip circumference; FFM, fat free mass; FFMI, fat free mass index; FM, fat mass; FMI, fat mass index; MAC, muscle arm circumference; MUAC, mid-upper arm circumference; RFM, Relative Fat Mass; SD, standard deviation; WC, waist circumference; WHR, waist-to-hip ratio; WHtR, waist-to-height ratio.

**Table S2.** The area under ROC curve (AUC), optimal cut-off values, sensitivity (Sens.), specificities (Spec.) and Youden Index of anthropometric indices in predicting sarcopenic obesity by using FMI-FFMI or FM to FFM ratio in women.

| Anthropometric indices                     | FFMI-FMI-sarcopenic obesity |      |           |          |         |       |       |              |
|--------------------------------------------|-----------------------------|------|-----------|----------|---------|-------|-------|--------------|
|                                            | AUC                         | SD   | 95% CI    | <i>p</i> | Cut off | Sens. | Spec. | Youden Index |
| ∑4 skinfolds, mm                           | 0.79                        | 0.04 | 0.73–0.84 | <0.0001  | 84.9    | 78.9  | 69.9  | 0.49         |
| ABSI, m <sup>11/6</sup> kg <sup>-2/3</sup> | 0.72                        | 0.04 | 0.66–0.78 | <0.0001  | 0.07    | 84.2  | 55.9  | 0.40         |
| AMA, cm                                    | 0.90                        | 0.02 | 0.85–0.94 | <0.0001  | 24.3    | 89.5  | 79.0  | 0.68         |
| AVI, cm <sup>2</sup>                       | 0.96                        | 0.01 | 0.93–0.98 | <0.0001  | 20.0    | 97.4  | 86.6  | 0.84         |
| BAI, %                                     | 0.94                        | 0.02 | 0.90–0.97 | <0.0001  | 34.3    | 86.8  | 87.1  | 0.74         |
| BMI, kg/m <sup>2</sup>                     | 0.96                        | 0.01 | 0.92–0.98 | <0.0001  | 31.6    | 94.7  | 90.3  | 0.85         |
| BRI, -                                     | 0.95                        | 0.01 | 0.92–0.98 | <0.0001  | 5.85    | 94.7  | 88.2  | 0.83         |
| FFM, %                                     | 0.95                        | 0.01 | 0.97–1.00 | <0.0001  | 55.6    | 100   | 98.9  | 0.99         |
| FM, %                                      | 1.00                        | 0.00 | 0.98–1.00 | <0.0001  | 44.4    | 100   | 100   | 1.00         |
| FM/FFM, -                                  | 0.87                        | 0.03 | 0.82–0.91 | <0.0001  | 17.5    | 92.1  | 76.3  | 0.68         |
| MAC, cm                                    | 0.90                        | 0.02 | 0.85–0.94 | <0.0001  | 47.0    | 89.5  | 79.0  | 0.68         |
| MUAC, cm                                   | 0.98                        | 0.01 | 0.96–1.00 | <0.0001  | 13.4    | 97.4  | 91.4  | 0.89         |
| MUAC/H, -                                  | 0.92                        | 0.02 | 0.88–0.95 | <0.0001  | 31.5    | 84.2  | 86.6  | 0.71         |
| RFM, -                                     | 0.93                        | 0.02 | 0.89–0.96 | <0.0001  | 0.19    | 92.1  | 83.9  | 0.76         |
| WC, cm                                     | 0.95                        | 0.01 | 0.92–0.98 | <0.0001  | 43.6    | 94.7  | 88.2  | 0.83         |
| WHR, -                                     | 0.96                        | 0.01 | 0.92–0.98 | <0.0001  | 99      | 97.4  | 86.0  | 0.84         |
| WHtR, -                                    | 0.84                        | 0.03 | 0.79–0.89 | <0.0001  | 0.84    | 94.7  | 71.0  | 0.66         |

ABSI, body shape index; AMA, mid-arm muscular area; AVI, abdominal volume index; BAI, body obesity index; BMI, body mass index; BRI, body roundness index; H, height; HC, hip circumference; FFM, fat free mass; FFMI, fat free mass index; FM, fat mass; FMI, fat mass index; MAC, muscle arm circumference; MUAC, mid-upper arm circumference; RFM, Relative Fat Mass; SD, standard deviation; WC, waist circumference; WHR, waist-to-hip ratio; WHtR, waist-to-height ratio.
